# Supplementary material for: Characterization of Wild Corsican Hops and Assessment of the Performances of German Hops in Corsican Environmental Conditions through a Multidisciplinary Approach
Source: MDPI journal article supplement (doi:10.3390/app11093756), 2021-04-21
Supplement: s1 [file s1]

**S.M.1 List of SSR loci, primer sequence and their respective annealing temperature (T °C) used in this study[32].**

| Primer        | For 5'→ 3'                 | Rev 5'→ 3'             | Size (bp) | T (°C) |
|---------------|----------------------------|------------------------|-----------|--------|
| <b>H1GT14</b> | CY5-GGCATGGCTAACTCTATATGC  | AAATAGAAGTGCCATAACTGA  | 165       | 54     |
| <b>H1GT16</b> | CY5-CCGTGATACAAATCTACCCAAA | CTCCAGTCAGCAATCTCTTCAA | 228       | 54     |
| <b>H1GT17</b> | CY5-GGTCCITAGTCACTTGCCAAT  | GACTGTTCTGAAGCACAATCAA | 182       | 54     |
| <b>H1ACA3</b> | CY5-CAAGTTGTTGGTTGATTTACAT | CTCCTTCCTGTGTTTACCAC   | 215       | 52     |
| <b>H1AGA7</b> | CY5-ACAAGCAGTAATGATGAGGA   | TCCAAGTCTCTCAATTAGGAA  | 180       | 54     |
| <b>H1GA23</b> | CY5-AAGCACGAAAACGACTTG     | GTTGCCCAAAATCACTGTT    | 245       | 54     |

**S.M.2. UPOV Hops morphological descriptors**

| Morphological characteristics      | Description                                                  |
|------------------------------------|--------------------------------------------------------------|
| Anthocyanin coloration             | Absent; weak; medium; strong; very strong                    |
| Size of blade                      | Small; medium; large                                         |
| Blistering of upper side of blade  | Absent; weak; medium; strong                                 |
| Color of upper side of blade       | Yellow; yellow green; green                                  |
| If green, intensity of green color | Light; medium; dark                                          |
| Time of flowering                  | Early; medium; late                                          |
| Size                               | Dwarf; normal                                                |
| Length                             | Short; medium; long; very long                               |
| Length                             | Short; medium; long                                          |
| Density of foliage                 | Sparse; medium; dense                                        |
| Number of cones per node           | Few; medium; many                                            |
| Total number of cones              | Few; medium; many                                            |
| Total number of cones              | Very few; few; medium; many; very many                       |
| Picking maturity                   | Early; medium; late                                          |
| Size                               | Small; medium; large                                         |
| Shape                              | Cylindric; narrow ovate; medium ovate; broad ovate; circular |
| Degree of opening of bracts        | Closed; just open; clearly open                              |
| Intensity of green color           | Light; medium; dark                                          |
| Size                               | Small; medium; large                                         |
| Ratio length/width                 | Small; medium; large                                         |
| Length of tip                      | Short; medium; long                                          |

Plant part indicated by color: **main shoot**; **leaf**; **flower**; **plant**; **side shoot from middle third of plant**; **side shoot from upper third of plant**; **cones**; **bract**.
